# Supplementary material for: Nonionic diethanolamide amphiphiles with unsaturated C18 hydrocarbon chains: thermotropic and lyotropic liquid crystalline phase behavior
Source: Royal Society of Chemistry journal article supplement (doi:10.1039/c1cp21808e), 2011-01-01
Supplement: c1cp21808e.pdf [file c1cp21808e.pdf]

## Supporting Information

### Nonionic Diethanolamide Amphiphiles with Unsaturated C18 Hydrocarbon Chains: Thermotropic and Lyotropic Liquid Crystalline Phase Behavior

Sharon M. Sagnella<sup>1</sup>, Charlotte E. Conn<sup>2</sup>, Irena Krodkiewska<sup>2</sup>, and Calum J. Drummond<sup>2,\*</sup>

<sup>1</sup>CSIRO Materials Science and Engineering, PO Box 184, North Ryde, NSW, 1670 Australia

<sup>2</sup>CSIRO Materials Science and Engineering, Bag 10, Clayton South, VIC, 3169, Australia

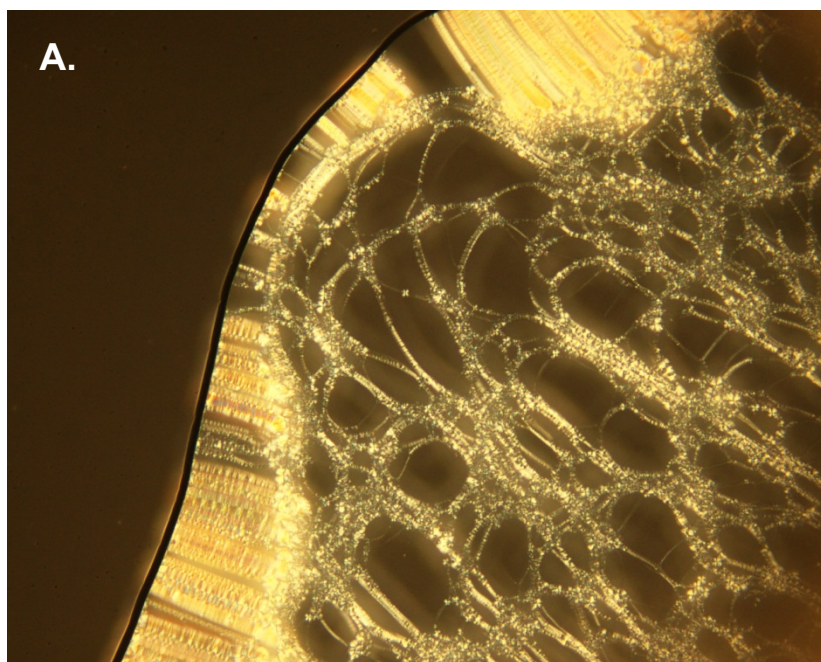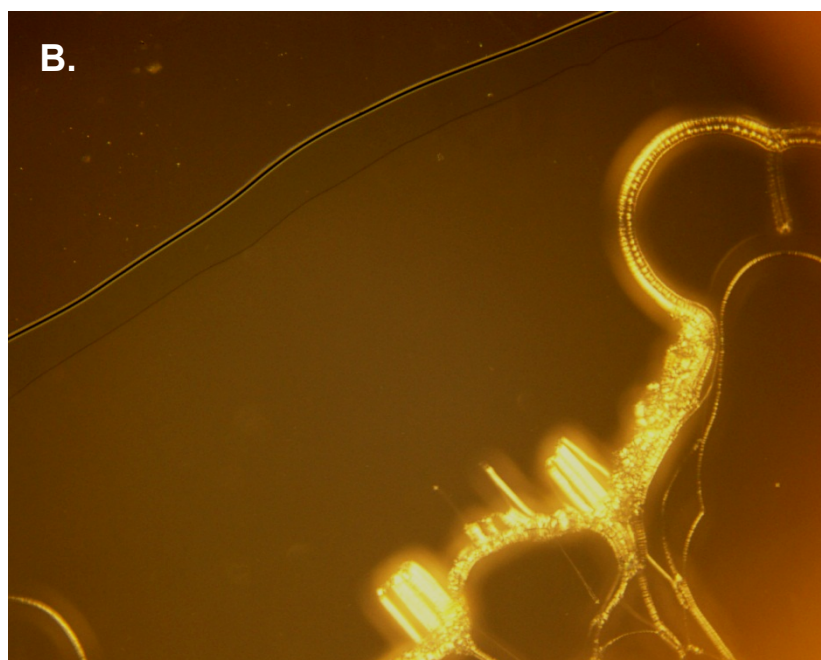

Figure S1: Polarized optical microscope images of neat linoleoyl diethanolamide. A. Image acquired at 15°C showing typical smectic liquid crystalline texture and B. Image acquired at 20°C, an isotropic band is present at the edge of the amphiphile indicating melting of the liquid crystalline phase to a fluid isotropic phase. These transitions occur at similar temperatures to the transitions indicated by DSC.

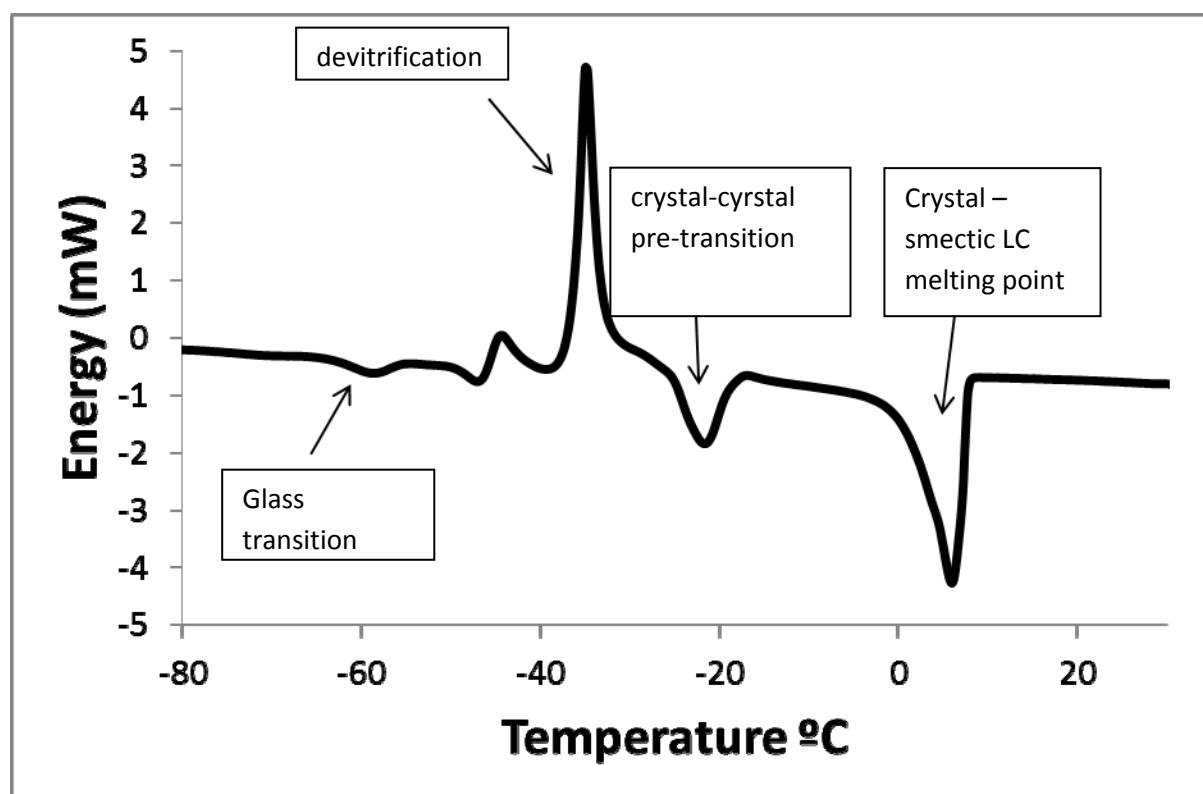

Figure S2: First Heating scan of Oleoyl Diethanolamide with transitions described in text indicated
